# Supplementary material for: Optimization of Low-Biomass Sample Collection and Quantitative PCR-Based Titration Impact 16S rRNA Microbiome Resolution
Source: PubMed Central journal article supplement (PMC9769501; doi:10.1128/spectrum.02255-22), 2022-11-15
Supplement: spectrum.02255-22-s0001.pdf [file spectrum.02255-22-s0001.pdf]

**Supplementary Table S1.** Table showing Benjamini Hochberg corrected Wilcoxon p-values for alternative sampling approaches for the host DNA, 16S rRNA copy number, Chao1, Inverse Simpson and Shannon presented in Figure 1 (i) – (v).

| Comparison 1 | Comparison 2 | Host DNA     | 16S          | Chao1        | Inverse Simpson | Shannon      |
|--------------|--------------|--------------|--------------|--------------|-----------------|--------------|
| Filter Swab  | Tissue       | <b>0.000</b> | <b>0.009</b> | <b>0.015</b> | <b>0.009</b>    | <b>0.008</b> |
| Filter Swab  | Tween 1%     | <b>0.032</b> | <b>0.009</b> | <b>0.015</b> | <b>0.009</b>    | <b>0.008</b> |
| Filter Swab  | Tween 0.1%   | 0.053        | 0.633        | <b>0.015</b> | <b>0.009</b>    | <b>0.008</b> |
| Filter Swab  | Tween 0.01%  | 0.995        | 0.28         | <b>0.015</b> | <b>0.009</b>    | <b>0.008</b> |
| Filter Swab  | NP40 0.1%    | 0.435        | 0.809        | <b>0.015</b> | <b>0.009</b>    | <b>0.008</b> |
| Filter Swab  | NP40 0.01%   | 0.435        | 0.052        | <b>0.015</b> | <b>0.009</b>    | <b>0.008</b> |
| Tissue       | Tween 1%     | <b>0.009</b> | <b>0.009</b> | 0.416        | <b>0.009</b>    | 0.416        |
| Tissue       | Tween 0.10%  | <b>0.000</b> | <b>0.009</b> | 0.416        | <b>0.009</b>    | <b>0.008</b> |
| Tissue       | Tween 0.01%  | <b>0.000</b> | <b>0.009</b> | 0.416        | <b>0.009</b>    | 0.090        |
| Tissue       | NP40 0.1%    | <b>0.000</b> | <b>0.009</b> | 0.189        | <b>0.009</b>    | 0.045        |
| Tissue       | NP40 0.01%   | <b>0.000</b> | <b>0.009</b> | 0.809        | <b>0.009</b>    | <b>0.008</b> |
| Tween 1%     | Tween 0.10%  | <b>0.032</b> | <b>0.009</b> | 0.809        | 0.174           | <b>0.045</b> |
| Tween 1%     | Tween 0.01%  | 0.053        | <b>0.009</b> | 0.189        | 0.051           | 0.163        |
| Tween 1%     | NP40 0.1%    | <b>0.000</b> | <b>0.009</b> | 0.416        | 0.412           | 0.808        |
| Tween 1%     | NP40 0.01%   | 0.172        | <b>0.009</b> | <b>0.015</b> | 0.174           | <b>0.008</b> |
| Tween 0.1%   | Tween 0.01%  | 0.053        | 0.163        | 0.416        | 0.808           | 0.416        |
| Tween 0.1%   | NP40 0.1%    | <b>0.009</b> | 0.809        | 0.189        | 0.412           | <b>0.008</b> |
| Tween 0.1%   | NP40 0.01%   | 0.435        | 0.163        | 0.061        | 0.808           | <b>0.008</b> |
| Tween 0.01%  | NP40 0.1%    | <b>0.009</b> | 0.163        | 0.189        | 0.412           | 0.416        |
| Tween 0.01%  | NP40 0.01%   | 0.435        | 0.435        | 0.061        | 0.412           | <b>0.008</b> |
| NP40 0.1%    | NP40 0.01%   | 0.995        | 0.163        | 0.061        | 0.174           | <b>0.008</b> |

**Supplementary Table. S2** Table showing BH corrected p-values for comparisons between alternative sampling approaches for the data presented in Figure 1 PCoA

| Fish Species            | Statistical test     | Comparison                    | Corrected p-value (Benjamini-Hochberg)              |
|-------------------------|----------------------|-------------------------------|-----------------------------------------------------|
| Rainbow trout           | PERMANOVA            | Different sampling approaches | P=0.001 , R <sup>2</sup> = 0.55699, F.Model =7.3343 |
|                         | Pairwise comparisons | Swab Vs Tissue                | 0.006281157                                         |
|                         |                      | Swab Vs NP40 0.01%            | 0.008723829                                         |
|                         |                      | Swab Vs NP40 0.1%             | 0.006281157                                         |
|                         |                      | Swab Vs Tween 0.01%           | 0.006281157                                         |
|                         |                      | Swab Vs Tween 0.1%            | 0.007613523                                         |
|                         |                      | Swab Vs Tween 1%              | 0.006281157                                         |
|                         |                      | Tissue Vs NP40 0.01%          | 0.006281157                                         |
|                         |                      | Tissue Vs NP40 0.1%           | 0.006281157                                         |
|                         |                      | Tissue Vs Tween 0.01%         | 0.006281157                                         |
|                         |                      | Tissue Vs Tween 0.1%          | 0.006281157                                         |
|                         |                      | Tissue Vs Tween 1%            | 0.006281157                                         |
|                         |                      | NP40 0.01% Vs NP40 0.1%       | 0.006281157                                         |
|                         |                      | NP40 0.01% Vs Tween 0.01%     | 0.328015952                                         |
|                         |                      | NP40 0.01% Vs Tween 0.1%      | 0.015353938                                         |
|                         |                      | NP40 0.01% Vs Tween 1%        | 0.009663318                                         |
|                         |                      | NP40 0.1% Vs Tween 0.01       | 0.455383848                                         |
|                         |                      | NP40 0.1% Vs Tween 0.1%       | 0.516450648                                         |
|                         |                      | NP40 0.1% Vs Tween 1%         | 0.057577268                                         |
|                         |                      | Tween 0.01% Vs Tween 0.1%     | 0.455383848                                         |
| Tween 0.01% Vs Tween 1% | 0.010468594          |                               |                                                     |
| Tween 0.1% Vs Tween 1%  | 0.133012727          |                               |                                                     |

**Supplementary Table S3.** Benjamini Hochberg corrected Wilcoxon p-values for comparisons between Reads, Chao 1, Inverse Simpson and Shannon diversity indexes and for PERMANOVA comparisons shown in the PCoA presented in Figure 3.

| Comparison 1 | Comparison 2 | Reads Wilcoxon | Chao1 Wilcoxon | Inverse Simpson Wilcoxon | Shannon Wilcoxon | PERMANOVA    |
|--------------|--------------|----------------|----------------|--------------------------|------------------|--------------|
| 1.00E+08     | 1.00E+07     | 0.46           | <b>0.003</b>   | <b>0.048</b>             | 0.045            | 0.779        |
| 1.00E+08     | 1.00E+06     | 0.46           | <b>0.003</b>   | 0.818                    | 0.045            | 0.779        |
| 1.00E+08     | 1.00E+05     | <b>0.004</b>   | <b>0.003</b>   | <b>0.023</b>             | 0.003            | <b>0.006</b> |
| 1.00E+08     | 1.00E+04     | <b>0.004</b>   | <b>0.003</b>   | <b>0.005</b>             | 0.003            | <b>0.010</b> |
| 1.00E+08     | 1.00E+03     | <b>0.004</b>   | <b>0.003</b>   | <b>0.005</b>             | 0.003            | <b>0.006</b> |
| 1.00E+08     | 1.00E+02     | <b>0.004</b>   | <b>0.003</b>   | <b>0.005</b>             | 0.003            | <b>0.006</b> |
| 1.00E+07     | 1.00E+06     | 0.066          | <b>0.003</b>   | <b>0.048</b>             | 0.003            | 0.779        |
| 1.00E+07     | 1.00E+05     | <b>0.004</b>   | <b>0.003</b>   | <b>0.015</b>             | 0.003            | <b>0.006</b> |
| 1.00E+07     | 1.00E+04     | <b>0.004</b>   | <b>0.003</b>   | <b>0.005</b>             | 0.003            | <b>0.006</b> |
| 1.00E+07     | 1.00E+03     | <b>0.004</b>   | <b>0.003</b>   | <b>0.005</b>             | 0.003            | <b>0.006</b> |
| 1.00E+07     | 1.00E+02     | <b>0.004</b>   | <b>0.003</b>   | <b>0.005</b>             | 0.003            | <b>0.008</b> |
| 1.00E+06     | 1.00E+05     | <b>0.004</b>   | <b>0.003</b>   | <b>0.048</b>             | 0.006            | <b>0.006</b> |
| 1.00E+06     | 1.00E+04     | <b>0.004</b>   | <b>0.003</b>   | <b>0.005</b>             | 0.003            | <b>0.006</b> |
| 1.00E+06     | 1.00E+03     | <b>0.004</b>   | <b>0.003</b>   | <b>0.005</b>             | 0.003            | <b>0.006</b> |
| 1.00E+06     | 1.00E+02     | <b>0.004</b>   | <b>0.003</b>   | <b>0.005</b>             | 0.003            | <b>0.006</b> |
| 1.00E+05     | 1.00E+04     | 0.651          | 0.734          | <b>0.036</b>             | 0.003            | 0.232        |
| 1.00E+05     | 1.00E+03     | 0.699          | 0.28           | <b>0.023</b>             | 0.019            | 0.136        |
| 1.00E+05     | 1.00E+02     | 0.46           | <b>0.02</b>    | <b>0.005</b>             | 0.003            | <b>0.009</b> |
| 1.00E+04     | 1.00E+03     | 0.46           | 0.435          | 0.265                    | 0.189            | 0.779        |
| 1.00E+04     | 1.00E+02     | 0.699          | 0.051          | <b>0.008</b>             | 0.006            | 0.232        |
| 1.00E+03     | 1.00E+02     | 0.46           | 0.818          | 0.414                    | 0.310            | 0.248        |

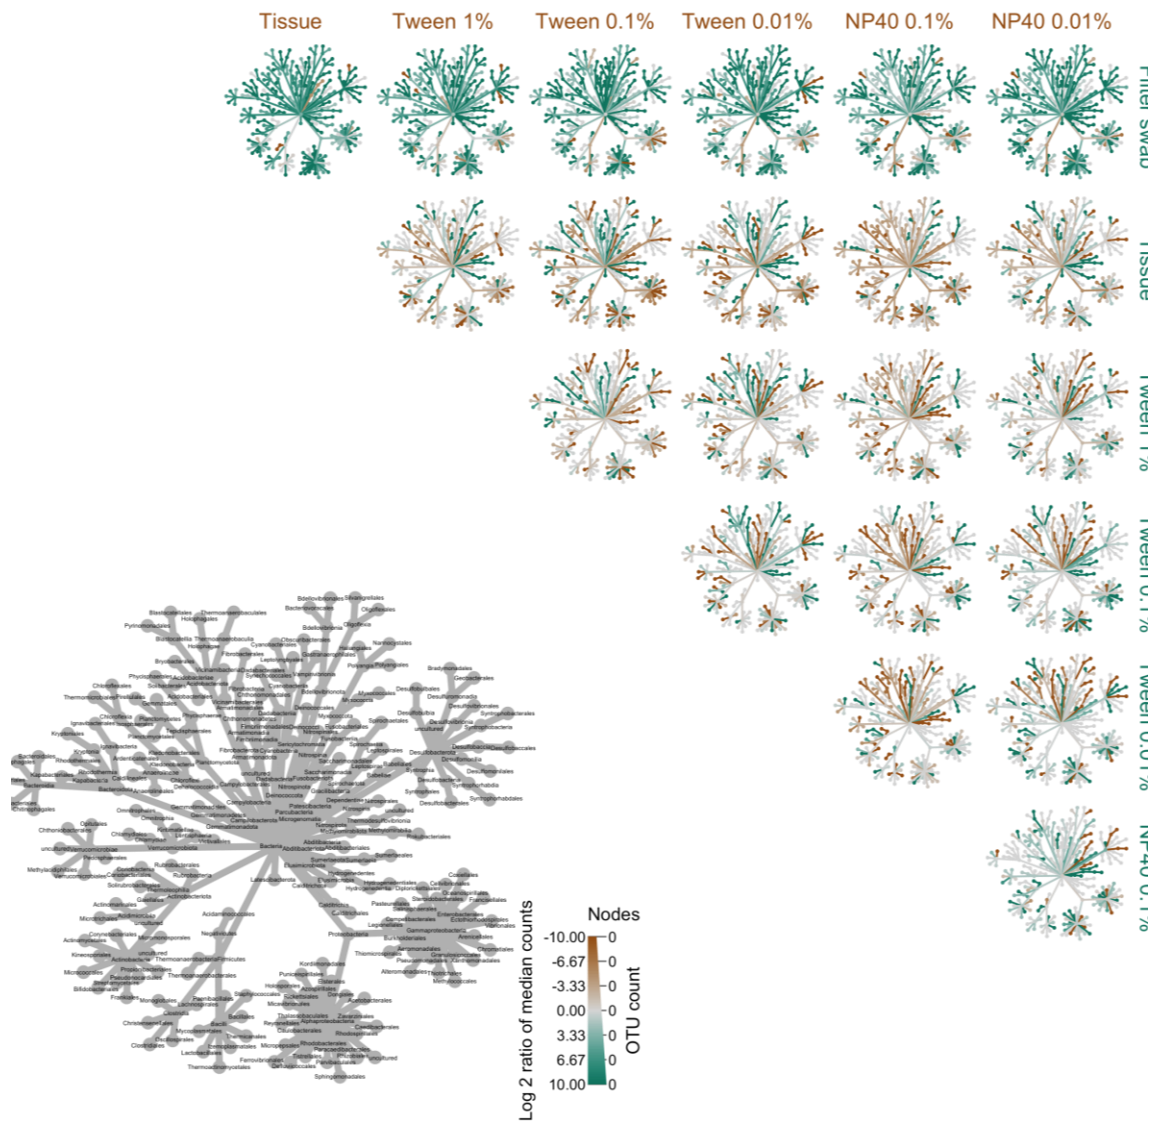

**Supplementary Figure S1.** Comparisons of significant differences in bacterial phylotype composition between samples. Comparisons are made using pair-wise comparisons between the samples named along the top and the samples named down the side. Each taxon is coloured based upon the log<sub>2</sub> ratio of reads observed in each group based upon the median proportion. Significant differences are coloured based on Wilcox rank-sum test followed by a Benjamini Hochberg correction.

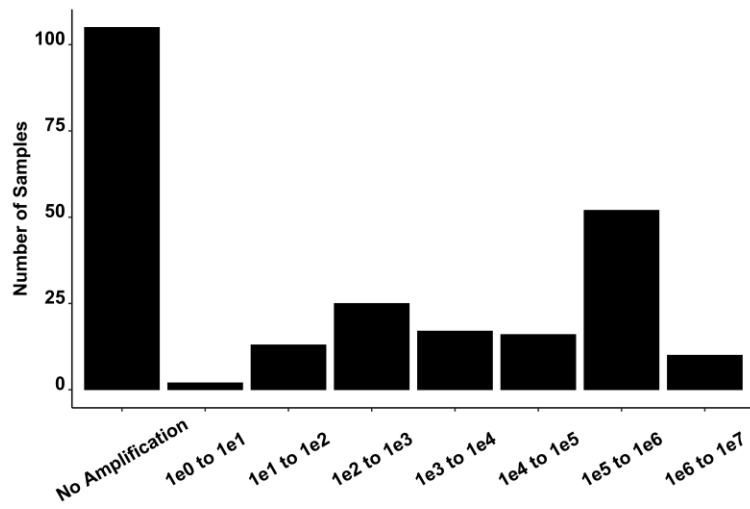

**Supplementary Figure S2.** Quantification of 16S rRNA copy numbers from a recent trial in our lab. Sample number in each group is presented as a total number and as a percentage of the total.

**Supplementary Table S4.** Quantification of 16S rRNA copy numbers from a recent trial in our lab. Sample number in each group is presented as a total number and as a percentage of the total.

| <b>Group</b>            | <b>Number of samples</b> | <b>Percentage of total samples collected</b> |
|-------------------------|--------------------------|----------------------------------------------|
| <b>No Amplification</b> | 105                      | 44%                                          |
| <b>1e0 to 1e1</b>       | 2                        | 1%                                           |
| <b>1e1 to 1e2</b>       | 13                       | 5%                                           |
| <b>1e2 to 1e3</b>       | 25                       | 10%                                          |
| <b>1e3 to 1e4</b>       | 17                       | 7%                                           |
| <b>1e4 to 1e5</b>       | 16                       | 7%                                           |
| <b>1e5 to 1e6</b>       | 52                       | 22%                                          |
| <b>1e6 to 1e7</b>       | 10                       | 4%                                           |

**Supplementary Table S5.** An example of 20 samples selected from the highest copy number samples from a recent trial are presented with the extracted DNA concentration as measured by Qubit and 16S copy number as quantified by qPCR. Copy number per 1 nanogram of DNA and per 1 uL is presented. A comparison between total copy number in a preparation using 20ng and no normalisation is shown against the theoretical maximum copies that could be included. Samples with higher than 1e5 in the initial step of library preparation are shown in bold.

| Sample | Qubit Conc ng/ul | 16s Copy Number in 1ng | 16s Copy Number in 1 uL of original sample | 16S Copy number in 10ngs of DNA | Copies in 4.2ul (Max Reaction Volume) |
|--------|------------------|------------------------|--------------------------------------------|---------------------------------|---------------------------------------|
| 1      | 23.1             | 4764                   | 110037                                     | 47635                           | <b>462155</b>                         |
| 2      | 10.4             | 1562                   | 16245                                      | 15620                           | 68228                                 |
| 3      | 17.5             | 2977                   | 52089                                      | 29765                           | <b>218773</b>                         |
| 4      | 17.6             | 577                    | 10159                                      | 5772                            | 42669                                 |
| 5      | 12.1             | 767                    | 9281                                       | 7670                            | 38979                                 |
| 6      | 20.2             | 4626                   | 93440                                      | 46258                           | <b>392449</b>                         |
| 7      | 18.1             | 2315                   | 41892                                      | 23145                           | <b>175948</b>                         |
| 8      | 13.9             | 641                    | 8915                                       | 6414                            | 37443                                 |
| 9      | 4.27             | 4900                   | 20923                                      | 48999                           | 87875                                 |
| 10     | 22.5             | 2977                   | 66971                                      | 29765                           | <b>281279</b>                         |
| 11     | 18.6             | 717                    | 13342                                      | 7173                            | 56038                                 |
| 12     | 18.4             | 5215                   | 95947                                      | 52145                           | <b>402977</b>                         |
| 13     | 20.9             | 693                    | 14487                                      | 6932                            | 60845                                 |
| 14     | 3.93             | 6857                   | 26948                                      | 68569                           | <b>113180</b>                         |
| 15     | 22.7             | 1205                   | 27348                                      | 12048                           | <b>114861</b>                         |
| 16     | 39.7             | 1832                   | 72730                                      | 18320                           | <b>305468</b>                         |
| 17     | 28.8             | 1300                   | 37442                                      | 13001                           | <b>157257</b>                         |
| 18     | 7.59             | 1294                   | 9821                                       | 12940                           | 41250                                 |
| 19     | 4.47             | 11660                  | 52120                                      | <b>116600</b>                   | <b>218904</b>                         |
| 20     | 25.3             | 1614                   | 40828                                      | 16138                           | <b>171477</b>                         |

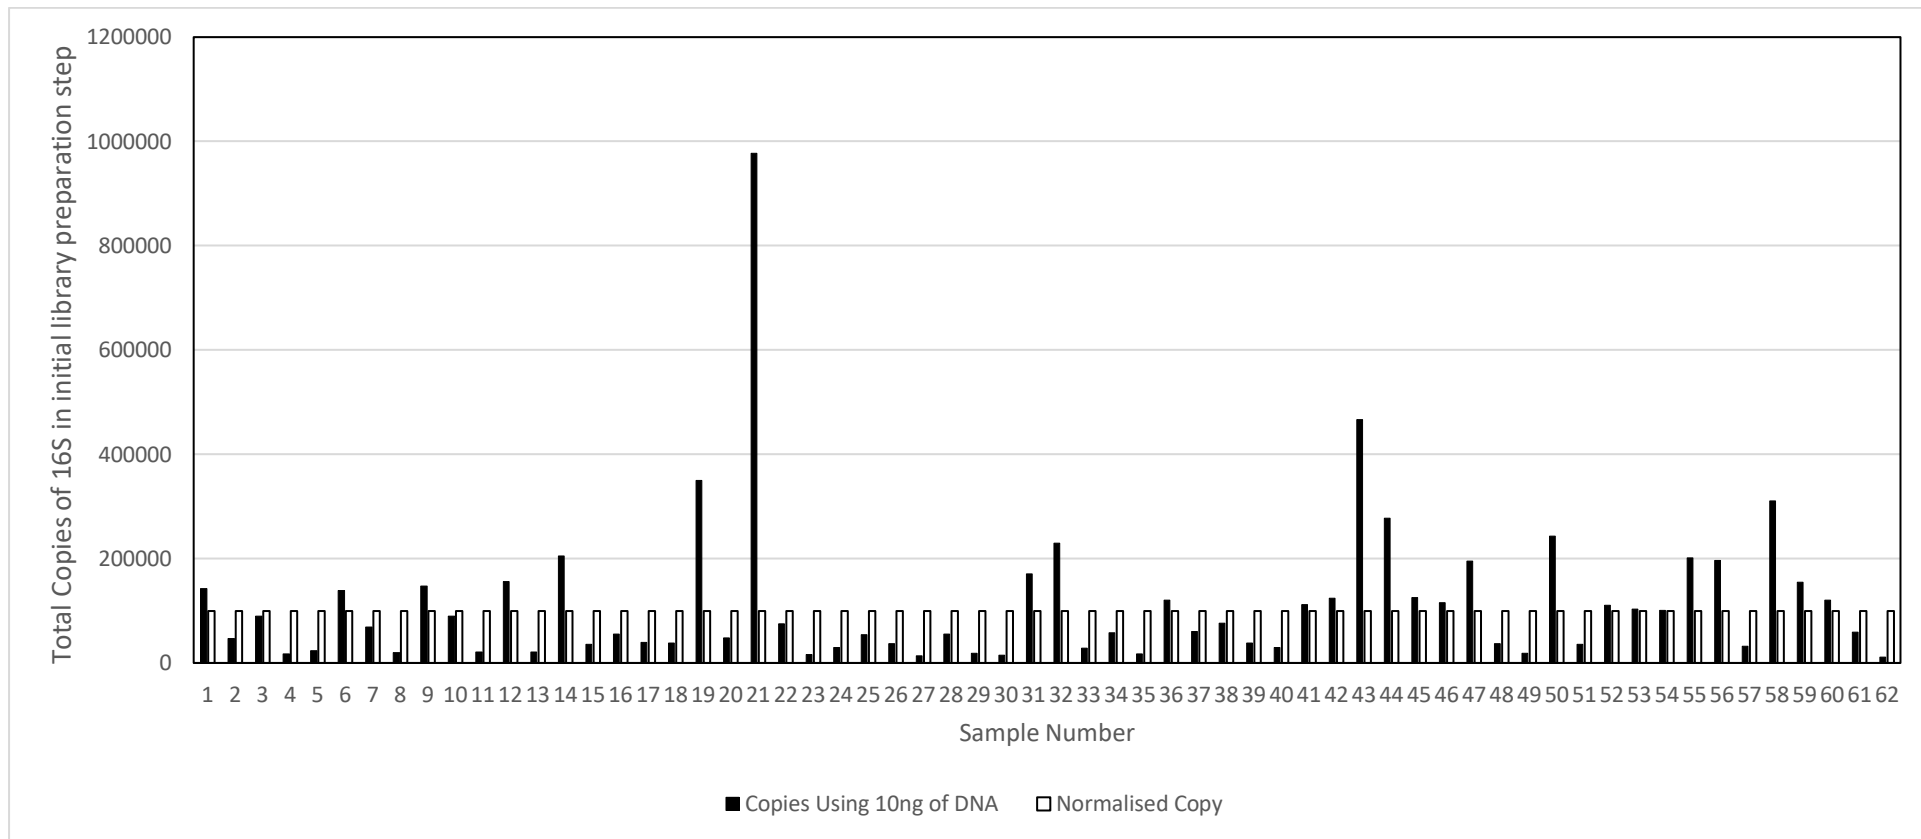

**Supplementary Figure S3.** Total copies of 16S present in a non-normalised library preparation using 10ng in triplicate versus normalised library preparation based upon an input of 1e5 copies



**Supplementary Table S6.** Table of primers and probes.

| Primer        | Primer Sequence (5'- 3')                                  | Target           | Size   | Reference                |
|---------------|-----------------------------------------------------------|------------------|--------|--------------------------|
| V3-4 [314F]   | CCTACGGGNGGCWGCAG                                         | 16S rDNA<br>V3-4 | 466    |                          |
| V3-4 [805R]   | GACTACHVGGGTATCTAATCC                                     |                  |        |                          |
| V3_V4_TaqMan  | ATTACCGCGGCTGCTGG                                         |                  |        |                          |
| 16s_V4F       | TCGTCGGCAGCGTCAGATGTGTATAAGAGACAGAYTGGGYDTAAAGNG          | 16S rDNA V4      | ~245bp | Ma <i>et al.</i><br>2017 |
| 16s_V4R_1     | GTCTCGTGGGCTCGGAGATGTGTATAAGAGACAGTACCRGGGTHTCTAATCC      |                  |        |                          |
| 16s_V4R_2     | GTCTCGTGGGCTCGGAGATGTGTATAAGAGACAGTACCAGAGTATCTAATTC      |                  |        |                          |
| 16s_V4R_3     | GTCTCGTGGGCTCGGAGATGTGTATAAGAGACAGCTACDSRGGTMTCTAATC      |                  |        |                          |
| 16s_V4R_4     | GTCTCGTGGGCTCGGAGATGTGTATAAGAGACAGTACNVGGGTATCTAATC       |                  |        |                          |
| V4_Sp1_Mix_F  | TCGTCGGCAGCGTCAGATGTGTATAAGAGACAGGAYTGGGYDTAAAGN*G        |                  |        |                          |
| V4_Sp1_Mix_R1 | GTCTCGTGGGCTCGGAGATGTGTATAAGAGACAGTCAGTACCRGGGTHTCTAATC*C |                  |        |                          |
| V4_Sp1_Mix_R2 | GTCTCGTGGGCTCGGAGATGTGTATAAGAGACAGTCAGTACCAGAGTATCTAATT*C |                  |        |                          |
| V4_Sp1_Mix_R3 | GTCTCGTGGGCTCGGAGATGTGTATAAGAGACAGTCAGCTACDSRGGTMTCTAAT*C |                  |        |                          |
| V4_Sp1_Mix_R4 | GTCTCGTGGGCTCGGAGATGTGTATAAGAGACAGTCAGTACNVGGGTATCTAAT*C  |                  |        |                          |
| V4_Sp4_Mix_F  | TCGTCGGCAGCGTCAGATGTGTATAAGAGACAGAGTCAYTGGGYDTAAAGN*G     |                  |        |                          |
| V4_Sp4_Mix_R1 | GTCTCGTGGGCTCGGAGATGTGTATAAGAGACAGCTACCRGGGTHTCTAATC*C    |                  |        |                          |
| V4_Sp4_Mix_R2 | GTCTCGTGGGCTCGGAGATGTGTATAAGAGACAGCTACCAGAGTATCTAATT*C    |                  |        |                          |
| V4_Sp4_Mix_R3 | GTCTCGTGGGCTCGGAGATGTGTATAAGAGACAGCCTACDSRGGTMTCTAAT*C    |                  |        |                          |
| V4_Sp4_Mix_R4 | GTCTCGTGGGCTCGGAGATGTGTATAAGAGACAGCTACNVGGGTATCTAAT*C     |                  |        |                          |
| AS_cldn18_F   | AGCTACATGTGATTGGCATCG                                     | claudin 18       | 241    |                          |
| AS_cldn18_R   | TCTTTCTACCTCAGTTATGGGATG                                  |                  |        |                          |
| OM_NaKa1a_F   | ACATTGAGTGATCCTGGGACG                                     | NaKa1a           | 173    |                          |
| OM_NaKa1a_R   | ATGTAAGATTGGGAGTGCGGT                                     |                  |        |                          |
